# Supplementary material
Source: PubMed Central journal article supplement (PMC3234970)
Supplement: supp_M111.296103_jbc.M111.296103-1.pdf [file supp_M111.296103_jbc.M111.296103-1.pdf]

| <b>P121C</b>  |                                                        |          |                |          |          |          |          |          |           |           |                             |
|---------------|--------------------------------------------------------|----------|----------------|----------|----------|----------|----------|----------|-----------|-----------|-----------------------------|
|               |                                                        |          | occurrence (%) |          |          |          |          |          |           |           |                             |
| <b>lipids</b> | <b>Concentration<br/>(<math>\mu\text{g/ml}</math>)</b> | <b>N</b> | <b>1</b>       | <b>2</b> | <b>3</b> | <b>4</b> | <b>5</b> | <b>6</b> | <b>P4</b> | <b>P5</b> | <b><math>\lambda</math></b> |
| DPhPC         | 0.17                                                   | 200      | 66.50          | 24.00    | 7.00     | 2.50     | 0.00     | 0.00     | 0.26      | 0.21      | 1.07                        |
| DPhPC         | 0.33                                                   | 201      | 56.22          | 34.33    | 6.47     | 2.99     | 0.00     | 0.00     | 0.31      | 0.25      | 1.23                        |
| DPhPC         | 0.57                                                   | 200      | 40.50          | 34.50    | 17.00    | 8.00     | 0.00     | 0.00     | 0.39      | 0.32      | 1.61                        |
| DPhPC         | 0.81                                                   | 200      | 33.00          | 39.50    | 18.50    | 9.00     | 0.00     | 0.00     | 0.44      | 0.36      | 1.84                        |
| DPhPC         | 1.21                                                   | 202      | 26.73          | 35.15    | 23.27    | 13.86    | 0.99     | 0.00     | 0.50      | 0.41      | 2.15                        |
| DPhPC         | 1.59                                                   | 800      | 27.70          | 30.19    | 31.55    | 9.94     | 0.50     | 0.12     | 0.53      | 0.43      | 2.19                        |
| DPhPC         | 2.33                                                   | 388      | 22.94          | 28.61    | 33.51    | 14.69    | 0.26     | 0.00     | 0.59      | 0.48      | 2.42                        |
|               |                                                        |          |                |          |          |          |          |          |           |           |                             |
| POPC-POPE     | 0.17                                                   | 201      | 65.67          | 26.37    | 6.97     | 1.00     | 0.00     | 0.00     | 0.27      | 0.22      | 1.10                        |
| POPC-POPE     | 0.33                                                   | 202      | 59.90          | 26.73    | 9.90     | 3.47     | 0.00     | 0.00     | 0.28      | 0.23      | 1.16                        |
| POPC-POPE     | 0.57                                                   | 207      | 46.38          | 37.20    | 12.08    | 4.35     | 0.00     | 0.00     | 0.35      | 0.28      | 1.43                        |
| POPC-POPE     | 0.81                                                   | 202      | 40.10          | 42.57    | 12.87    | 4.46     | 0.00     | 0.00     | 0.39      | 0.32      | 1.58                        |
| POPC-POPE     | 1.21                                                   | 201      | 37.31          | 35.32    | 19.90    | 6.97     | 0.50     | 0.00     | 0.42      | 0.34      | 1.72                        |
| POPC-POPE     | 1.59                                                   | 607      | 26.85          | 30.64    | 32.29    | 9.56     | 0.49     | 0.16     | 0.54      | 0.44      | 2.21                        |
| POPC-POPE     | 2.33                                                   | 768      | 28.78          | 29.95    | 31.90    | 8.98     | 0.39     | 0.00     | 0.53      | 0.43      | 2.15                        |
|               |                                                        |          |                |          |          |          |          |          |           |           |                             |
| <b>F50C</b>   |                                                        |          |                |          |          |          |          |          |           |           |                             |
| DPhPC         | 0.17                                                   | 206      | 72.33          | 20.87    | 5.34     | 1.46     | 0.00     | 0.00     | 0.25      | 0.20      | 1.02                        |
| DPhPC         | 0.33                                                   | 204      | 57.84          | 23.53    | 14.22    | 4.41     | 0.00     | 0.00     | 0.28      | 0.23      | 1.18                        |
| DPhPC         | 0.57                                                   | 200      | 35.50          | 35.00    | 18.50    | 11.00    | 0.00     | 0.00     | 0.42      | 0.35      | 1.79                        |
| DPhPC         | 0.81                                                   | 204      | 27.45          | 32.35    | 27.45    | 12.75    | 0.00     | 0.00     | 0.52      | 0.42      | 2.17                        |
| DPhPC         | 1.21                                                   | 200      | 28.00          | 32.50    | 25.00    | 14.00    | 0.50     | 0.00     | 0.51      | 0.42      | 2.14                        |
| DPhPC         | 1.59                                                   | 310      | 16.77          | 27.10    | 35.16    | 20.00    | 0.97     | 0.00     | 0.65      | 0.53      | 2.70                        |
| DPhPC         | 2.33                                                   | 406      | 24.14          | 24.63    | 33.25    | 17.24    | 0.74     | 0.00     | 0.60      | 0.49      | 2.48                        |
|               |                                                        |          |                |          |          |          |          |          |           |           |                             |
| POPC-POPE     | 0.17                                                   | 243      | 65.43          | 25.51    | 7.00     | 2.06     | 0.00     | 0.00     | 0.27      | 0.22      | 1.09                        |
| POPC-POPE     | 0.33                                                   | 204      | 57.84          | 25.49    | 13.73    | 2.94     | 0.00     | 0.00     | 0.29      | 0.23      | 1.19                        |
| POPC-POPE     | 0.57                                                   | 203      | 46.80          | 35.96    | 13.30    | 3.94     | 0.00     | 0.00     | 0.35      | 0.28      | 1.43                        |
| POPC-POPE     | 0.81                                                   | 235      | 37.45          | 40.43    | 16.17    | 5.96     | 0.00     | 0.00     | 0.41      | 0.33      | 1.68                        |
| POPC-POPE     | 1.21                                                   | 205      | 33.17          | 29.21    | 26.24    | 11.39    | 0.00     | 0.00     | 0.47      | 0.39      | 1.98                        |
| POPC-POPE     | 1.59                                                   | 930      | 23.59          | 29.35    | 34.47    | 12.06    | 0.53     | 0.00     | 0.58      | 0.47      | 2.37                        |
| POPC-POPE     | 2.33                                                   | 800      | 28.00          | 29.50    | 32.13    | 10.13    | 0.25     | 0.00     | 0.53      | 0.43      | 2.19                        |

**Table 1- Summary of the results**

Table showing the summary of the distributions for F50C and P121C for both lipid compositions. N gives the number of experiments, P4 and P5 the probabilities p for a binomial distribution with  $n = 4$  and  $5$ , respectively.  $\lambda$  is the fit parameter for Poisson distributions to each condition.
