# Supplementary material
Source: PubMed Central journal article supplement (PMC3234970)
Supplement: supp_M111.296103_jbc.M111.296103-2.pdf [file supp_M111.296103_jbc.M111.296103-2.pdf]

A

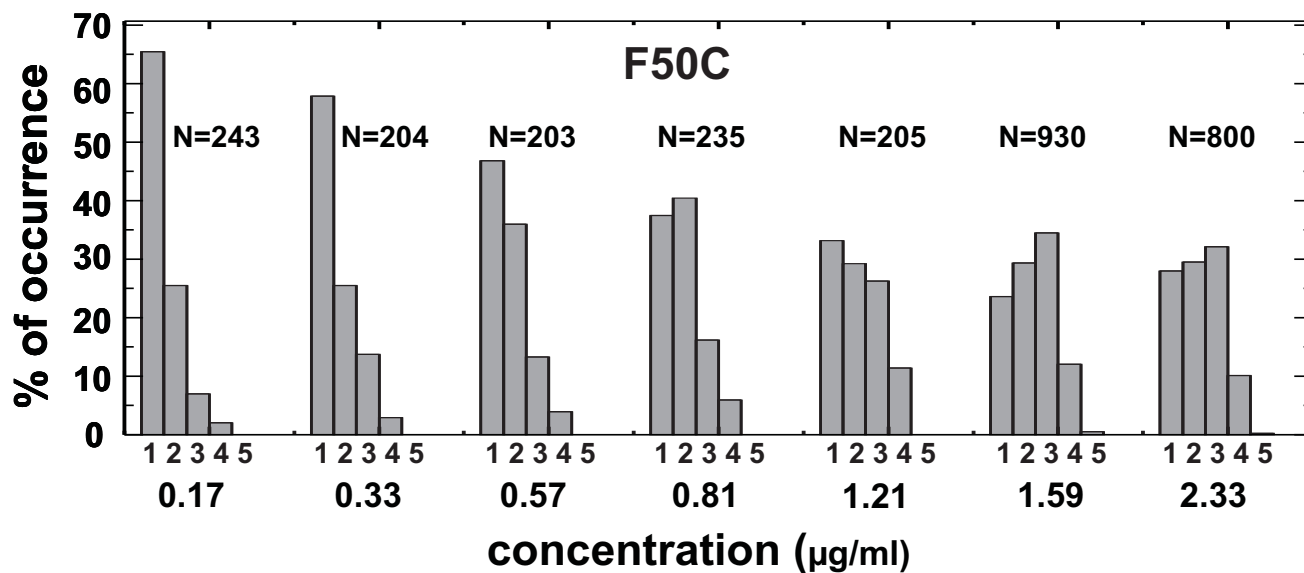

B

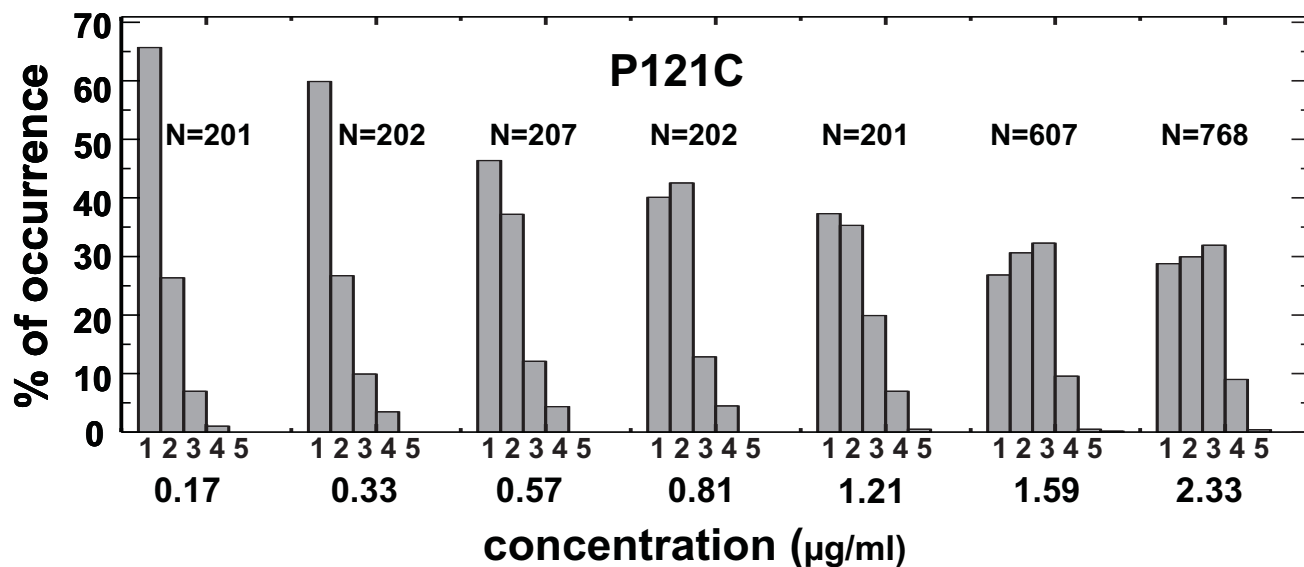

**Supplementary figure 1 – Experimental distributions in POPE-POPC**

Distribution of (a) F50C and (b) P121C bleaching steps in POPE-POPC vesicles containing variable toxin concentrations incubated overnight. The numbers under the columns indicate the number of steps observed, N marks the number of spots analyzed for each concentration.
