# Supplementary material
Source: PubMed Central journal article supplement (PMC3234970)
Supplement: supp_M111.296103_jbc.M111.296103-3.pdf [file supp_M111.296103_jbc.M111.296103-3.pdf]

## SUPPLEMENTARY MATERIAL I

### Derivation of oligomer distribution

According to the model in figure 4A, an oligomer consisting of n monomers is given by

$$A_n = (K_a)^{n-1} A_1 = \left(\frac{\alpha'}{\beta}\right)^{n-1} A_1$$

with  $\alpha' = \alpha$  [Cry1Aa]. The above statement is equivalent to the equation

$$A_n = K_a A_{n-1} = \frac{\alpha'}{\beta} A_{n-1}$$

This can be shown for  $A_2$  from the differential equation describing the temporal evolution of  $A_1$ :

$$\frac{d}{dt} A_1 = -\alpha' A_1 + \beta A_2,$$

and in equilibrium

$$\begin{aligned} \frac{d}{dt} A_1 &= 0 \\ \Rightarrow A_2 &= \frac{\alpha'}{\beta} A_1 \end{aligned}$$

We will show that this is true for  $A_{n+1}$  under the assumption that it is true for  $A_n$ .

$$\frac{d}{dt} A_n = \alpha' A_{n-1} - (\alpha' + \beta) A_n + \beta A_{n+1}$$

with

$$A_{n-1} = \frac{\beta}{\alpha'} A_n$$

follows

$$\frac{d}{dt} A_n = \beta A_n - (\alpha' + \beta) A_n + \beta A_{n+1}$$

which should equal zero in equilibrium, thus

$$A_{n+1} = \frac{\alpha'}{\beta} A_n$$

As it is true for  $A_2$ , it is thus iteratively true for all  $A_n$ .

### Calculation of the probability to observe $x$ pentamers in an ensemble of $N$ measurements.

The problem was to determine the order (4 or 5) of the binomial distribution that best fit the experimentally observed values. As the distribution of 1-4 subunits may be comparably well fitted by both distributions (but see main text for p-value dependence), the decisive observable is the number of pentamers observed for a given number of spots  $N$  analyzed. Let us assume that the distribution has been optimally fitted to a binomial distribution of the order  $n = 4$  and 5. For each distribution, a probability for the observance of pentamers will be given. In the case of  $n = 4$  this probability will be zero, in the case of  $n = 5$ , it is given by:

$$\langle x \rangle = N p^5,$$

where  $N$  is the number of total spots analyzed and  $p$  the probability of a monomer to be detected.

We have to determine the probability  $prob(x)$  that the experimentally observed number of pentamers  $x$  can be explained by a binomial distribution of order  $n = 5$  and probability  $p$ . To this end, we calculate the value of the Poisson probability density function with parameter  $\langle x \rangle$ , the expected value of pentamers, for the experimentally observed value  $x$

$$prob(x) = \frac{\langle x \rangle^x}{x!} \exp(-\langle x \rangle) = \frac{(Np^5)^x}{x!} \exp(-Np^5)$$

$prob(x)$  gives the probability to observe in an ensemble of  $N$  spots which are binomially distributed with order  $n = 5$  exactly  $x$  pentamers.

The analysis of our experimental data following the above calculations resulted in values below 1% for each condition (mutant and lipid composition). What is more, for each analysis, the observed value  $x$  was on the lower end of the Poisson probability density function (Suppl. Fig. 2). We can thus conclude that the observed values are not consistent with a binomial distribution of order  $n = 5$  or higher.

Naturally, the probability to observe exactly  $x$  pentamers in a binomial distribution or 4<sup>th</sup> order is zero. However, as explained in the main manuscript, the number of observed pentamers corresponds exactly with the number of pentamers expected due to unspecific labeling.
