# Supplementary material
Source: PubMed Central journal article supplement (PMC3234970)
Supplement: supp_M111.296103_jbc.M111.296103-4.pdf [file supp_M111.296103_jbc.M111.296103-4.pdf]

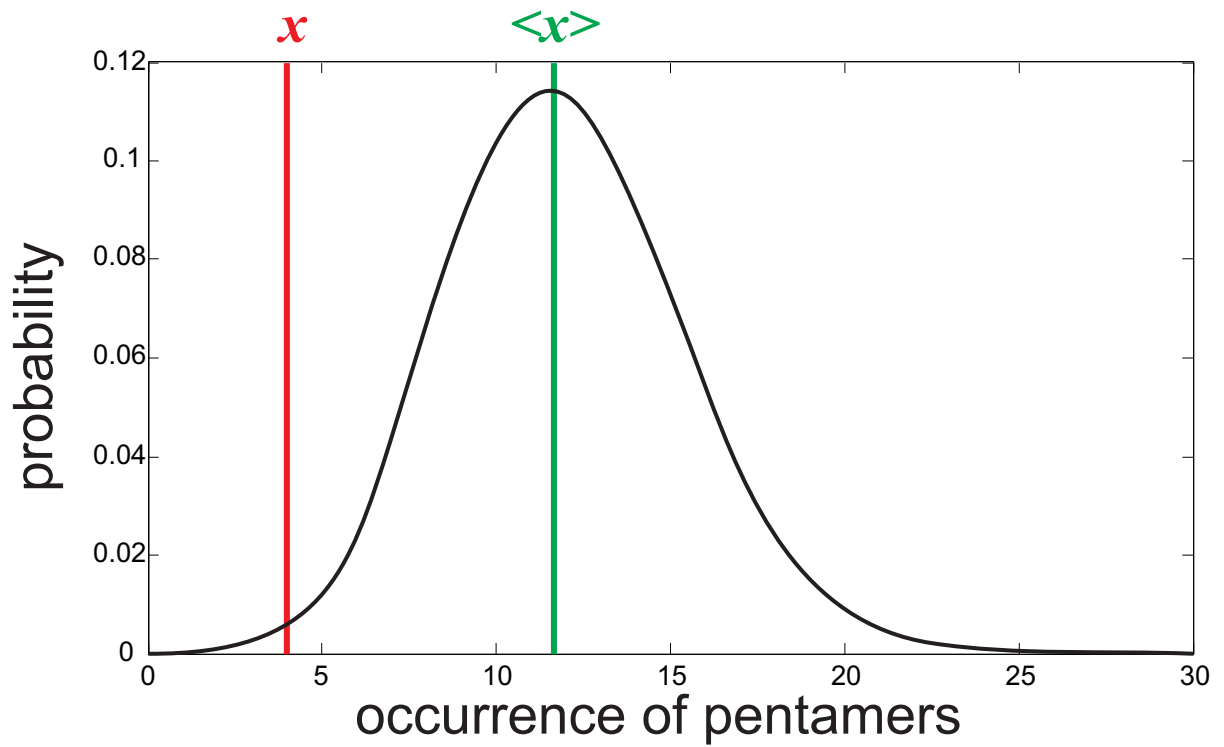

**Supplementary Figure 2: Poisson Probability Density Function**

$\langle x \rangle$  depicts the value for the occurrence of pentamers, which is theoretically to be expected according to a binomial fit to the observed data.  $x$  is the experimentally observed number of pentamers. The curve gives the probability to observe  $x$  pentamers. For all experimental conditions,  $x$  was found in the lower tail of the Poisson distribution.
